# Supplementary material
Source: MDPI journal article supplement (https://www.mdpi.com/1999-4907/10/9/776)
Supplement: s1 [file s1]

## Supplementary

**Table S1.** Percentages of responses to Likert scale items about timber harvesting in Florida.

|            |    | Items                                                                                              | Strongly<br>Disagree (1) | Disagree<br>(2) | Neutral<br>(3) | Agree<br>(4) | Strongly<br>Agree (5) | Total Number of<br>Responses |
|------------|----|----------------------------------------------------------------------------------------------------|--------------------------|-----------------|----------------|--------------|-----------------------|------------------------------|
| Production | 1. | Harvesting is good for the economy.                                                                | 3.6                      | 7.8             | 31.9           | 37.1         | 19.6                  | 423                          |
|            | 2. | Cutting and removing trees is sometimes necessary to provide economic profits to the forest owner. | 6.2                      | 6.9             | 31.2           | 37.8         | 18                    | 423                          |
|            | 3. | Forests should be used to produce products such as paper or lumber that humans can use.            | 4.5                      | 10.2            | 32.4           | 35           | 18                    | 423                          |
| Management | 4. | Forests should be left untouched by humans.                                                        | 7.8                      | 21.8            | 39             | 19.4         | 12.1                  | 423                          |
|            | 5. | Cutting trees can sometimes be good for a forest.                                                  | 4.3                      | 7.1             | 24.4           | 31           | 33.3                  | 423                          |
|            | 6. | Some forest management by humans is necessary.                                                     | 5                        | 6.9             | 23.6           | 31.4         | 33.1                  | 423                          |
|            | 7. | Cutting and removing trees should be followed by planting trees.                                   | 2.1                      | 5               | 12.1           | 22.5         | 58.4                  | 423                          |
|            | 8. | When necessary, trees should be cut and removed from forests to prevent forest fires.              | 6.9                      | 6.6             | 26             | 28.8         | 31.7                  | 423                          |

**Table S2.** Percentages of responses to Likert scale items about timber harvesting in Georgia.

|            |    | Items                                                                                              | Strongly<br>Disagree (1) | Disagree<br>(2) | Neutral<br>(3) | Agree<br>(4) | Strongly<br>Agree (5) | Total Number of<br>Responses |
|------------|----|----------------------------------------------------------------------------------------------------|--------------------------|-----------------|----------------|--------------|-----------------------|------------------------------|
| Production | 1. | Harvesting is good for the economy.                                                                | 2                        | 6.9             | 23.3           | 43.5         | 24.3                  | 407                          |
|            | 2. | Cutting and removing trees is sometimes necessary to provide economic profits to the forest owner. | 4.4                      | 9.6             | 27             | 36.1         | 22.9                  | 407                          |
|            | 3. | Forests should be used to produce products such as paper or lumber that humans can use.            | 3.7                      | 11.1            | 27.3           | 34.9         | 23.1                  | 407                          |
| Management | 4. | Forests should be left untouched by humans.                                                        | 11.8                     | 26.8            | 36.6           | 12.8         | 12                    | 407                          |
|            | 5. | Cutting trees can sometimes be good for a forest.                                                  | 3.9                      | 6.6             | 21.4           | 29           | 39.1                  | 407                          |
|            | 6. | Some forest management by humans is necessary.                                                     | 2.7                      | 6.1             | 18.9           | 32.2         | 40.1                  | 407                          |
|            | 7. | Cutting and removing trees should be followed by planting trees.                                   | 3.4                      | 2.5             | 13.5           | 16.5         | 64.1                  | 407                          |
|            | 8. | When necessary, trees should be cut and removed from forests to prevent forest fires.              | 4.4                      | 6.6             | 24.6           | 32.4         | 31.9                  | 407                          |

**Table S3.** Percentages of responses to Likert scale items about timber harvesting in Mississippi.

|            |    | Items                                                                                              | Strongly<br>Disagree (1) | Disagree<br>(2) | Neutral<br>(3) | Agree<br>(4) | Strongly<br>Agree (5) | Total Number of<br>Responses |
|------------|----|----------------------------------------------------------------------------------------------------|--------------------------|-----------------|----------------|--------------|-----------------------|------------------------------|
| Production | 1. | Harvesting is good for the economy.                                                                | 1.2                      | 3.9             | 24.4           | 43.2         | 27.3                  | 410                          |
|            | 2. | Cutting and removing trees is sometimes necessary to provide economic profits to the forest owner. | 2.7                      | 10.5            | 26.6           | 35.1         | 25.1                  | 410                          |
|            | 3. | Forests should be used to produce products such as paper or lumber that humans can use.            | 2.9                      | 9.5             | 33.7           | 32.7         | 21.2                  | 410                          |
| Management | 4. | Forests should be left untouched by humans.                                                        | 13.9                     | 29.8            | 34.9           | 13.4         | 8.1                   | 410                          |
|            | 5. | Cutting trees can sometimes be good for a forest.                                                  | 2.7                      | 5.9             | 17.8           | 30.7         | 42.9                  | 410                          |
|            | 6. | Some forest management by humans is necessary.                                                     | 2                        | 4.2             | 19             | 32.7         | 42.2                  | 410                          |
|            | 7. | Cutting and removing trees should be followed by planting trees.                                   | 2.4                      | 1.7             | 11             | 18.5         | 66.3                  | 410                          |
|            | 8. | When necessary, trees should be cut and removed from forests to prevent forest fires.              | 3.7                      | 9               | 21.2           | 29.3         | 36.8                  | 410                          |

**Table S4.** Percentages of responses to Likert scale items about timber harvesting in South Carolina.

|            |    | Items                                                                                              | Strongly<br>Disagree (1) | Disagree<br>(2) | Neutral<br>(3) | Agree<br>(4) | Strongly<br>Agree (5) | Total Number of<br>Responses |
|------------|----|----------------------------------------------------------------------------------------------------|--------------------------|-----------------|----------------|--------------|-----------------------|------------------------------|
| Production | 1. | Harvesting is good for the economy.                                                                | 2.8                      | 5.6             | 27.3           | 40.3         | 24                    | 429                          |
|            | 2. | Cutting and removing trees is sometimes necessary to provide economic profits to the forest owner. | 4                        | 11.7            | 29.1           | 31.2         | 24                    | 429                          |
|            | 3. | Forests should be used to produce products such as paper or lumber that humans can use.            | 3.5                      | 12.4            | 28.2           | 33.8         | 22.1                  | 429                          |
| Management | 4. | Forests should be left untouched by humans.                                                        | 13.5                     | 23.3            | 35.4           | 18.2         | 9.6                   | 429                          |
|            | 5. | Cutting trees can sometimes be good for a forest.                                                  | 5.1                      | 4.4             | 21.5           | 31.2         | 37.8                  | 429                          |
|            | 6. | Some forest management by humans is necessary.                                                     | 4.2                      | 4.9             | 18.9           | 32.4         | 39.6                  | 429                          |
|            | 7. | Cutting and removing trees should be followed by planting trees.                                   | 2.6                      | 2.6             | 11.4           | 18.2         | 65.3                  | 429                          |
|            | 8. | When necessary, trees should be cut and removed from forests to prevent forest fires.              | 5.8                      | 5.4             | 22.4           | 28.9         | 37.5                  | 429                          |

**Table S5.** Percentages of responses to Likert scale items about government's approach to private forest management in Florida.

| Items                |    |                                                                                                                           | Strongly<br>Disagree (1) | Disagree<br>(2) | Neutral<br>(3) | Agree<br>(4) | Strongly<br>Agree (5) | Total Number of<br>Responses |
|----------------------|----|---------------------------------------------------------------------------------------------------------------------------|--------------------------|-----------------|----------------|--------------|-----------------------|------------------------------|
| Authority tools      | 1. | The government should be able to regulate the use of forests located on private land to protect public benefits.          | 9.5                      | 13.7            | 27.4           | 24.1         | 25.3                  | 423                          |
|                      | 2. | The government should have the right to tell private forest owners how to best manage their forests.                      | 14.2                     | 17.7            | 30.7           | 18.2         | 19.2                  | 423                          |
|                      | 3. | There should be regulations regarding how trees are managed on private forest land.                                       | 8.8                      | 11.8            | 24.1           | 28.8         | 26.5                  | 423                          |
|                      | 4. | The government should fine private forest owners who fail to use best management practices.                               | 8.8                      | 11.8            | 27.2           | 25.1         | 27.2                  | 423                          |
| Financial incentives | 5. | The government should use financial incentives to help or encourage private forest owners to change management practices. | 3.1                      | 7.8             | 35.5           | 26.2         | 27.4                  | 423                          |
| Empowerment tools    | 6. | The government should conduct workshops on forest best management practices for private forest owners.                    | 3.6                      | 4.3             | 23.6           | 34.5         | 34                    | 423                          |
|                      | 7. | The government is responsible for promoting and understanding of forest conservation.                                     | 3.3                      | 7.1             | 29.8           | 31           | 28.8                  | 423                          |
|                      | 8. | The government and private forest owners should work together towards forest conservation.                                | 2.8                      | 5               | 16.6           | 29.1         | 46.6                  | 423                          |
|                      | 9. | The government should use positive images and cultural symbols to promote forest conservation.                            | 3.3                      | 4.3             | 21             | 31.9         | 39.5                  | 423                          |
|                      |    |                                                                                                                           |                          |                 |                |              |                       |                              |

**Table S6.** Percentages of responses to Likert scale items about government's approach to private forest management in Georgia.

|                      |    | Items                                                                                                                     | Strongly<br>Disagree (1) | Disagree<br>(2) | Neutral<br>(3) | Agree<br>(4) | Strongly<br>Agree (5) | Total Number of<br>Responses |
|----------------------|----|---------------------------------------------------------------------------------------------------------------------------|--------------------------|-----------------|----------------|--------------|-----------------------|------------------------------|
| Authority tools      | 1. | The government should be able to regulate the use of forests located on private land to protect public benefits.          | 15.5                     | 13.3            | 32.9           | 18.4         | 19.9                  | 407                          |
|                      | 2. | The government should have the right to tell private forest owners how to best manage their forests.                      | 24.3                     | 17.4            | 28.3           | 18.2         | 11.8                  | 407                          |
|                      | 3. | There should be regulations regarding how trees are managed on private forest land.                                       | 15                       | 12              | 26             | 28.3         | 18.7                  | 407                          |
|                      | 4. | The government should fine private forest owners who fail to use best management practices.                               | 19.7                     | 10.3            | 27             | 20.9         | 22.1                  | 407                          |
| Financial incentives | 5. | The government should use financial incentives to help or encourage private forest owners to change management practices. | 5.4                      | 6.6             | 33.4           | 30           | 24.6                  | 407                          |
| Empowerment tools    | 6. | The government should conduct workshops on forest best management practices for private forest owners.                    | 3.4                      | 5.4             | 21.6           | 35.9         | 33.7                  | 407                          |
|                      | 7. | The government is responsible for promoting and understanding of forest conservation.                                     | 4.9                      | 9.1             | 31.7           | 29.5         | 24.8                  | 407                          |
|                      | 8. | The government and private forest owners should work together towards forest conservation.                                | 3.4                      | 4.4             | 15.5           | 25.1         | 51.6                  | 407                          |
|                      | 9. | The government should use positive images and cultural symbols to promote forest conservation.                            | 3                        | 4.9             | 22.4           | 30.5         | 39.3                  | 407                          |
|                      |    |                                                                                                                           |                          |                 |                |              |                       |                              |

**Table S7.** Percentages of responses to Likert scale items about government's approach to private forest management in Mississippi.

| Items                |    |                                                                                                                           | Strongly<br>Disagree (1) | Disagree<br>(2) | Neutral<br>(3) | Agree<br>(4) | Strongly<br>Agree (5) | Total Number of<br>Responses |
|----------------------|----|---------------------------------------------------------------------------------------------------------------------------|--------------------------|-----------------|----------------|--------------|-----------------------|------------------------------|
| Authority tools      | 1. | The government should be able to regulate the use of forests located on private land to protect public benefits.          | 19.5                     | 18.1            | 29             | 16.3         | 17.1                  | 410                          |
|                      | 2. | The government should have the right to tell private forest owners how to best manage their forests.                      | 24.9                     | 20              | 30.2           | 14.6         | 10.2                  | 410                          |
|                      | 3. | There should be regulations regarding how trees are managed on private forest land.                                       | 13.2                     | 16.6            | 29.3           | 24.9         | 16.1                  | 410                          |
|                      | 4. | The government should fine private forest owners who fail to use best management practices.                               | 19.8                     | 14.4            | 28.5           | 20           | 17.3                  | 410                          |
| Financial incentives | 5. | The government should use financial incentives to help or encourage private forest owners to change management practices. | 4.4                      | 7.3             | 35.9           | 27.3         | 25.1                  | 410                          |
| Empowerment tools    | 6. | The government should conduct workshops on forest best management practices for private forest owners.                    | 1.2                      | 4.6             | 21.2           | 32.2         | 40.7                  | 410                          |
|                      | 7. | The government is responsible for promoting and understanding of forest conservation.                                     | 4.2                      | 9.8             | 29.5           | 31           | 25.6                  | 410                          |
|                      | 8. | The government and private forest owners should work together towards forest conservation.                                | 1.7                      | 2.9             | 17.8           | 26.8         | 50.7                  | 410                          |
|                      | 9. | The government should use positive images and cultural symbols to promote forest conservation.                            | 1.5                      | 2.7             | 22.7           | 38.3         | 34.9                  | 410                          |

**Table S8.** Percentages of responses to Likert scale items about government's approach to private forest management in South Carolina.

| Items                |    |                                                                                                                           | Strongly<br>Disagree (1) | Disagree<br>(2) | Neutral<br>(3) | Agree<br>(4) | Strongly<br>Agree (5) | Total Number of<br>Responses |
|----------------------|----|---------------------------------------------------------------------------------------------------------------------------|--------------------------|-----------------|----------------|--------------|-----------------------|------------------------------|
| Authority tools      | 1. | The government should be able to regulate the use of forests located on private land to protect public benefits.          | 16.3                     | 13.8            | 28.9           | 20.5         | 20.5                  | 429                          |
|                      | 2. | The government should have the right to tell private forest owners how to best manage their forests.                      | 22.1                     | 18.4            | 29.1           | 18.7         | 11.7                  | 429                          |
|                      | 3. | There should be regulations regarding how trees are managed on private forest land.                                       | 11.4                     | 12.8            | 27             | 27.3         | 21.5                  | 429                          |
|                      | 4. | The government should fine private forest owners who fail to use best management practices.                               | 17                       | 11.2            | 27.3           | 23.1         | 21.5                  | 429                          |
| Financial incentives | 5. | The government should use financial incentives to help or encourage private forest owners to change management practices. | 5.6                      | 8.9             | 35.2           | 26.6         | 23.8                  | 429                          |
| Empowerment tools    | 6. | The government should conduct workshops on forest best management practices for private forest owners.                    | 3                        | 5.8             | 22.6           | 35.4         | 33.1                  | 429                          |
|                      | 7. | The government is responsible for promoting and understanding of forest conservation.                                     | 4                        | 9.8             | 36.8           | 26.6         | 22.8                  | 429                          |
|                      | 8. | The government and private forest owners should work together towards forest conservation.                                | 3                        | 3.5             | 17             | 26.3         | 50.1                  | 429                          |
|                      | 9. | The government should use positive images and cultural symbols to promote forest conservation.                            | 3.5                      | 5.8             | 21.2           | 28.4         | 41                    | 429                          |
